# Supplementary material for: Energetic polymeric networks prepared via a solvent- and catalyst-free thermal cycloaddition of azide-bearing polymers with alkynes and hydroxyl-isocyanate addition reactions
Source: Royal Society of Chemistry journal article supplement (doi:10.1039/c5py01276g), 2015-01-01
Supplement: c5py01276g1.pdf [file c5py01276g1.pdf]

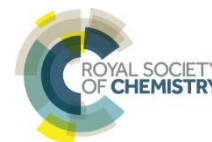

Journal Name

ARTICLE

## Supplementary Information

# Energetic Polymeric Network Prepared via a Solvent- and Catalyst-Free Thermal Cycloaddition of Azide-Bearing Polymer with Alkynes and Hydroxyl-isocyanate Addition Reactions

Byoung Sun Min<sup>a, b</sup>, Heung Bae Jeon<sup>c</sup>, Tae Uk Jeong<sup>a</sup>, Sang Youl Kim<sup>a\*</sup>

<sup>a</sup>Department of Chemistry, Korea Advanced Institute of Science and Technology (KAIST), 373-1, Guseong-dong, Yuseong-gu, Daejeon, 305-701, Korea

<sup>b</sup>4-R&D Institute, Rocket Propulsion Directorate, Agency for Defense Development, Yuseong P.O. Box 35-5, Daejeon 305-600, Korea

<sup>c</sup>Department of Chemistry, Kwangwoon University, Wolgye-Dong, Nowon-gu, Seoul, 139-701, Korea.

### 1. Synthesis of dipolarophiles with terminal alkynes

Dipolarophile **1~2** and **3**, **5** were synthesized and used, as described previously.<sup>1</sup>

#### 1,1,1-Tris[(propioloyloxy)methyl]propane **4**

To a solution of 1,1,1-tris(hydroxymethyl)propane (20.0 g, 0.149 mol) and propiolic acid (41.8 g, 0.597 mol) in benzene (800 mL) was added *p*-Toluenesulfonic acid (*p*-TsOH, 3.00 g, 0.015 mol). The mixture was heated up to 100°C for 2 days using a Dean-Stark trap to eliminate H<sub>2</sub>O. The resulting mixture was concentrated in vacuo and the residue was subjected to column chromatography with EtOAc-hexane (1/1) as the eluent to obtain the desired product in a 35% yield: <sup>1</sup>H NMR (400 MHz, CDCl<sub>3</sub>) δ 0.90 (t, *J* = 7.6 Hz, 3H), 1.54 (q, *J* = 7.4 Hz, 2H), 2.91 (s, 3H), 4.16 (s, 6H); <sup>13</sup>C NMR (100 MHz, CDCl<sub>3</sub>) δ 7.2, 22.7, 40.6, 65.1, 74.0, 75.6, 152.1.

#### 1,3,5-Tripropargyloxybenzene **6**

Propargyl bromide (53.5 g, 0.450 mol) was added to a solution of phloroglucinol (14.0 g, 0.111 mol) and K<sub>2</sub>CO<sub>3</sub> (62.14 g, 0.450 mol) in DMF (200 mL). The resulting solution was stirred at room temperature for 4 days and then concentrated in a vacuum. The residue was extracted with CH<sub>2</sub>Cl<sub>2</sub> (200 mL × 3) and H<sub>2</sub>O. The organic layer was separated, dried with Na<sub>2</sub>SO<sub>4</sub>, and concentrated in a vacuum. The residue was subjected to column chromatography with EtOAc-hexanes (1/8) as an eluent to obtain the desired product in 65% yield: <sup>1</sup>H NMR (400 MHz, CDCl<sub>3</sub>) δ 2.52 (t, *J* = 2.4 Hz, 3H), 4.63 (d, *J* = 2.3 Hz, 6H), 6.24 (s, 3H); <sup>13</sup>C NMR (100 MHz, CDCl<sub>3</sub>) δ 55.9, 75.7, 78.2, 95.4, 159.3.

#### 2,4,6-Tripropargyloxy-1,3,5-triazine **7**

Propargyl alcohol (18.7 g, 0.334 mol) was added slowly to a solution of cyanuric chloride (15.4 g, 0.085 mol) and K<sub>2</sub>CO<sub>3</sub> (36.4 g, 0.263 mol) in DMF (100 mL). The resulting solution was stirred at room temperature for 2 days and then concentrated in a vacuum. The residue was dissolved in CH<sub>2</sub>Cl<sub>2</sub> (200 mL × 3) and H<sub>2</sub>O. The organic layer was separated, washed with dilute 10% citric acid, and washed with

saturated brine. Then, it was dried with  $\text{Na}_2\text{SO}_4$  and concentrated in a vacuum. To the residue was added  $\text{Et}_2\text{O}$  (200 mL) and the solid which was not dissolved in  $\text{Et}_2\text{O}$  was filtered off. The filtrate was concentrated in a vacuum to obtain the desired product in 71% yield:  $^1\text{H}$  NMR (400 MHz,  $\text{CDCl}_3$ )  $\delta$  2.51 (t,  $J$  = 2.4 Hz, 3H), 5.02 (d,  $J$  = 2.4 Hz, 6H);  $^{13}\text{C}$  NMR (100 MHz,  $\text{CDCl}_3$ )  $\delta$  55.9, 56.9, 75.9, 172.4.

***1,1,1-Tris[(propargyloxy)methyl]propane 8***

Propargyl bromide (59.5 g, 0.500 mol) was added to a solution of 1,1,1-tris(hydroxymethyl)propane (13.4 g, 0.100 mol) and KOH (57.0 g, 1.02 mol) in DMSO (300 mL). The resulting solution was stirred at room temperature for 2 days. The reaction mixture was extracted with  $\text{Et}_2\text{O}$  (300 mL  $\times$  3) and  $\text{H}_2\text{O}$ . The organic layer was separated, dried with  $\text{Na}_2\text{SO}_4$ , and concentrated in a vacuum. The residue was subjected to column chromatography with EtOAc-hexanes (1/30) as an eluent to obtain the desired product in 58% yield:  $^1\text{H}$  NMR (400 MHz,  $\text{CDCl}_3$ )  $\delta$  0.86 (t,  $J$  = 7.7 Hz, 3H), 1.41 (q,  $J$  = 7.6 Hz, 2H), 2.38 (t,  $J$  = 2.4 Hz, 3H), 3.39 (s, 6H), 4.10 (d,  $J$  = 2.4 Hz, 6H);  $^{13}\text{C}$  NMR (100 MHz,  $\text{CDCl}_3$ )  $\delta$  7.5, 22.7, 42.8, 58.6, 70.3, 74.0, 80.1.

2. Stress-strain curves of the azide-bearing networks crosslinked via triazole moieties or both triazole and urethane moieties.

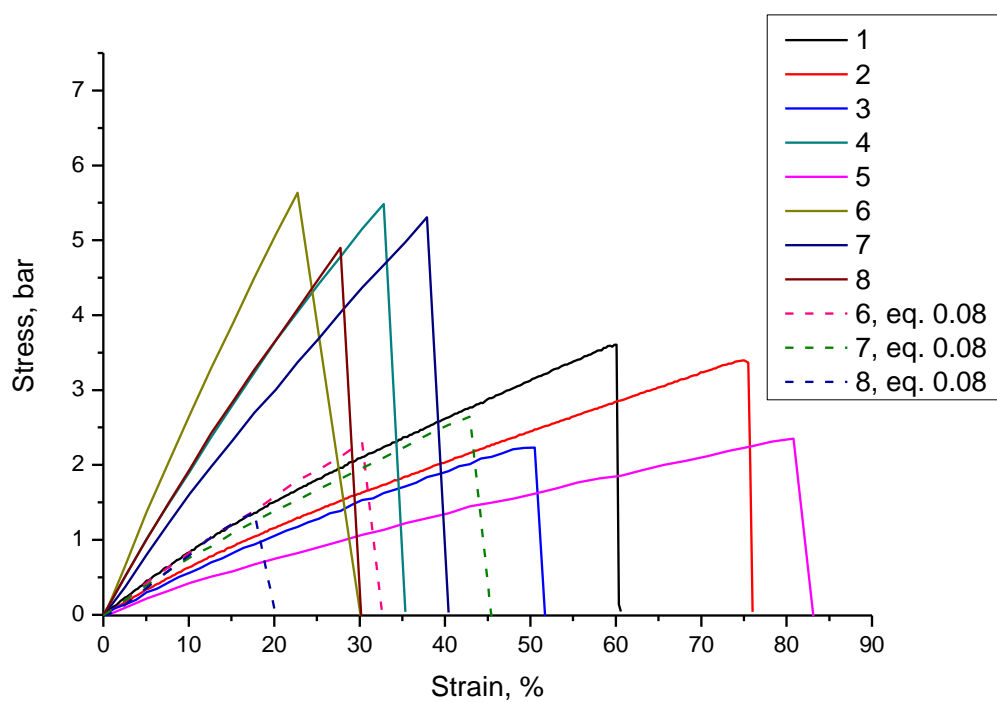

Fig. S1 Stress-strain curves of azide-bearing networks crosslinked via triazole moieties depending on the kind of dipolarophiles.

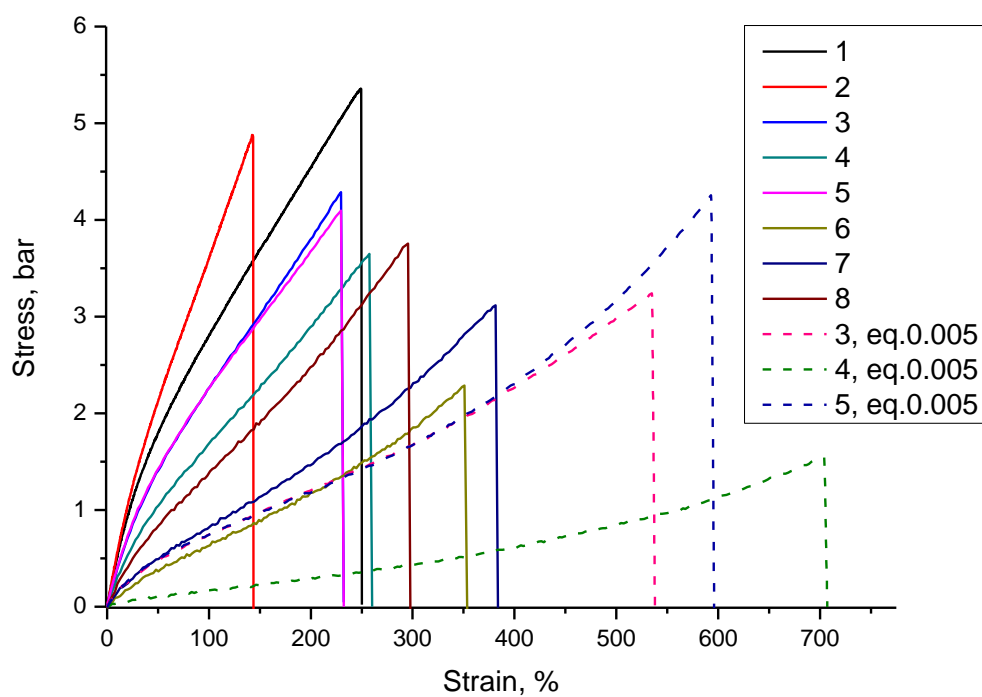

**Fig. S2** Stress-strain curves of azide-bearing networks crosslinked via both triazole moieties and urethane moieties depending on the kind of dipolarophiles.

### 3. Gaussian calculations

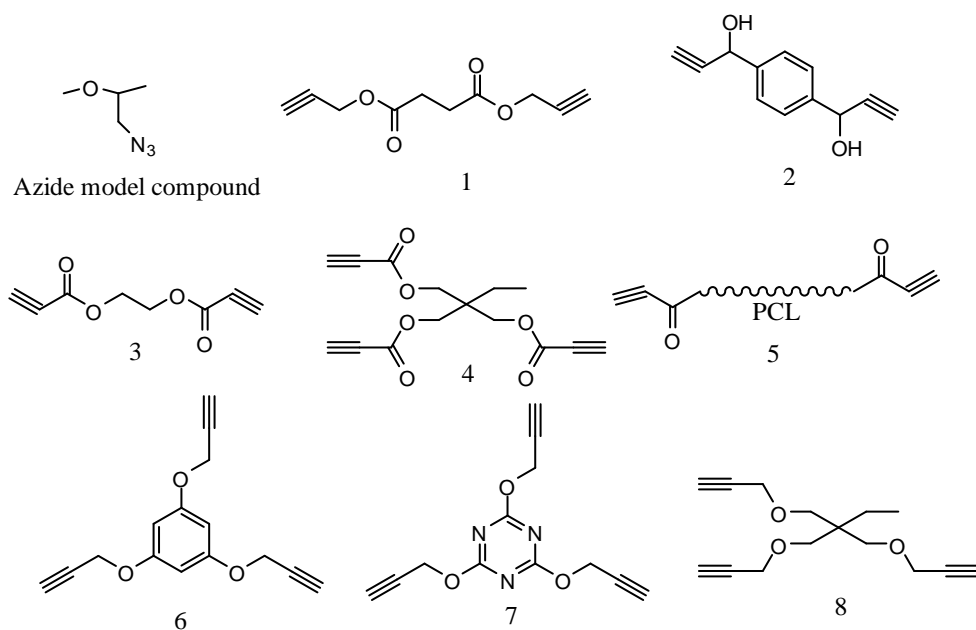

Table S1. Calculated Orbital Energies (B3LYP/6-31G\*)(kcal/mol)

| Dipole        | HOMO    | LUMO   |
|---------------|---------|--------|
| Azide         | -159.48 | -17.28 |
| Dipolarophile | HOMO    | LUMO   |
| 1             | -172.3  | -1.36  |
| 2             | -149.45 | -9.19  |
| 3             | -180.68 | -33.23 |
| 4             | -178.65 | -36.53 |
| 6             | -137.1  | 8.1    |
| 7             | -171.54 | -12.84 |
| 8             | -157    | -16.37 |

## Azide model compound

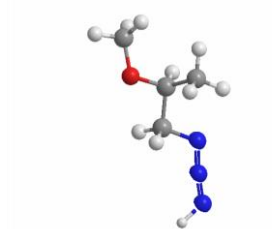

Alpha occ. eigenvalues -- -0.25414

Alpha virt. eigenvalues -- -0.02754 0.01176 0.08526 0.09895 0.12564

## Dipolarophile 1

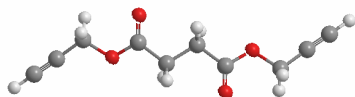

Alpha occ. eigenvalues -- -0.27457

Alpha virt. eigenvalues -- -0.00217 0.00828 0.01910 0.02259 0.04577

## Dipolarophile 2

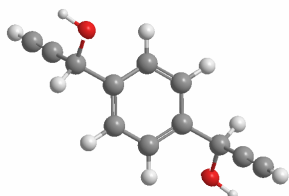

Alpha occ. eigenvalues -- -0.26868 -0.26791 -0.24776 -0.23816

Alpha virt. eigenvalues -- -0.01465 -0.00169 0.03006 0.04290 0.04750

## Dipolarophile 3

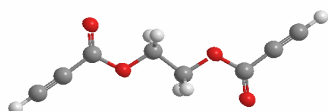

Alpha occ. eigenvalues -- -0.30564 -0.28846 -0.28793

Alpha virt. eigenvalues -- -0.05295 -0.05097 0.01899 0.02633 0.08864

## Dipolarophile 4

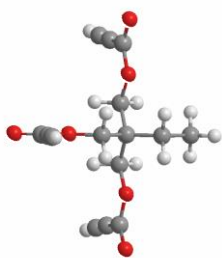

Alpha occ. eigenvalues -- -0.28470

Alpha virt. eigenvalues -- -0.05821 -0.05776 -0.05428 0.01362 0.01499

## Dipolarophile 6

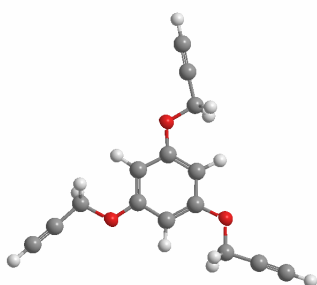

Alpha occ. eigenvalues -- -0.26917 -0.21851 -0.21849

Alpha virt. eigenvalues -- 0.01291 0.01293 0.02409 0.02650 0.02651

## Dipolarophile 7

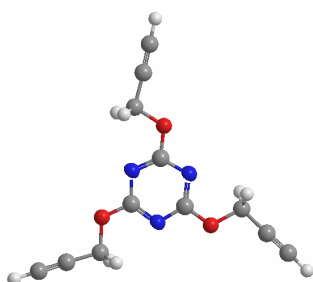

Alpha occ. eigenvalues -- -0.27566 -0.27339 -0.27337

Alpha virt. eigenvalues -- -0.02046 -0.02045 0.01972 0.02129 0.02132

## Journal Name

## ARTICLE

Dipolarophile **8**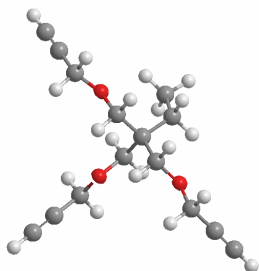

Alpha occ. eigenvalues -- -0.25728 -0.25019

Alpha virt. eigenvalues -- 0.02609 0.03430 0.03508 0.05468 0.05578

**1. References**

- 1 B.S. Min, Y. C. Park and J.C. Yoo, *Propellants, Explos. Pyrotech.*, 2012, **37**, 59; D. H. Lee, K. T. Kim, Y. Jang, S. Lee, H. B. Jeon, H. J. Paik, B. S. Min and W. Kim, *J. App. Polym. Sci.*, 2014, **131**, 40594.
